# Supplementary material for: Impedance spectroscopy of single bacterial nanofilament reveals water-mediated charge transfer
Source: PubMed Central journal article supplement (PMC5774759; doi:10.1371/journal.pone.0191289), 2018-01-19
Supplement: pone.0191289.s003.pdf [file pone.0191289.s003.pdf]

**Table S1. Tabulated Raman Spectroscopy data and comparison with published materials**

| Experimental Data |    |            |    | Shewanella and heme lines |   |         |   |         |   |       |      | Flagella and Flagellin |      |             | Comment      |   |                                                                                           |
|-------------------|----|------------|----|---------------------------|---|---------|---|---------|---|-------|------|------------------------|------|-------------|--------------|---|-------------------------------------------------------------------------------------------|
| SERS              |    | HS Raman   |    | Porfirine[1]              |   | MtrC[2] |   | OmcA[2] |   | CS[2] |      | CS II[3]               |      | Flagella[4] | Flagellin[4] |   |                                                                                           |
|                   |    | 170        | w  |                           |   |         |   |         |   |       |      |                        |      |             |              |   | No comment                                                                                |
|                   |    | 216        | vw |                           |   |         |   |         |   |       |      |                        |      |             |              |   | Histidine                                                                                 |
| 232               | vs | 238        | w  |                           |   |         |   |         |   |       |      |                        |      |             |              |   | $\gamma_{24}$ ImH[5]                                                                      |
|                   |    | 268        | vw |                           |   |         |   |         |   |       |      |                        |      |             |              |   | No comment                                                                                |
|                   |    | 284        | vw |                           |   |         |   |         |   |       |      |                        |      |             |              |   | No comment                                                                                |
|                   |    | 332        | vw |                           |   |         |   |         |   |       |      |                        |      |             |              |   | No comment                                                                                |
|                   |    |            |    |                           |   |         |   |         |   |       | 346  | w                      |      |             |              |   | No comment                                                                                |
| <b>386</b>        | m  | <b>394</b> | m  |                           |   |         |   |         |   |       | 394  | vs                     |      |             |              |   | Indicates six-coordinated $Fe^{II}$ in low-spin state[6]                                  |
| 443               | m  | 443        | vw |                           |   |         |   |         |   |       | 447  | m                      |      |             |              |   | $\gamma_{22}$ ImH [5]                                                                     |
|                   |    |            |    |                           |   |         |   |         |   |       | 466  | m                      |      |             |              |   | No comment                                                                                |
| 487               | w  |            |    |                           |   |         |   |         |   |       |      |                        |      |             |              |   | No comment                                                                                |
| 500               | vw |            |    |                           |   |         |   |         |   |       | 500  | m                      |      |             |              |   | No comment                                                                                |
|                   |    | 518        | vs |                           |   |         |   |         |   |       |      |                        |      |             |              |   | $SiO_2$ substrate                                                                         |
| 525               | w  |            |    |                           |   |         |   |         |   |       |      |                        |      |             |              |   | No comment                                                                                |
|                   |    |            |    |                           |   |         |   |         |   |       | 534  | m                      |      |             |              |   | No comment                                                                                |
| 543               | s  |            |    |                           |   |         |   |         |   |       |      |                        |      |             |              |   | Substrate                                                                                 |
| 579               | s  | 571        | w  |                           |   |         |   |         |   |       |      |                        |      |             |              |   | No comment                                                                                |
| 615               | m  |            |    |                           |   |         |   |         |   |       |      |                        |      |             |              |   | No comment                                                                                |
| 630               | m  | 638        | m  |                           |   |         |   |         |   |       | 630  | vs                     |      |             |              |   | No comment                                                                                |
| 666               | w  | 668        | vw |                           |   |         |   |         |   |       |      |                        |      |             |              |   | No comment                                                                                |
|                   |    |            |    |                           |   |         |   |         |   |       | 675  | m                      |      |             |              |   | No comment                                                                                |
| 690               | vw | 690        | w  | 692                       | m |         |   |         |   |       |      |                        |      |             |              |   | Heme                                                                                      |
|                   |    |            |    |                           |   |         |   |         |   |       | 712  | w                      |      |             |              |   | No comment                                                                                |
| 738               | m  | 735        | m  |                           |   |         |   |         |   |       |      |                        |      |             |              |   | No comment                                                                                |
|                   |    |            |    | 752                       | s |         |   |         |   |       |      |                        | 750  | w           |              |   | No comment                                                                                |
| 777               | vw | 778        | w  |                           |   |         |   |         |   |       | 768  | m                      |      |             |              |   | No comment                                                                                |
| 802               | w  |            |    |                           |   |         |   |         |   |       | 808  | w                      |      |             |              |   | No comment                                                                                |
| 832               | s  | 827        | s  |                           |   |         |   |         |   |       |      |                        |      |             |              |   | $CCH$ (aliphatic)[7]                                                                      |
| 860               | w  |            |    |                           |   |         |   |         |   |       | 864  | s                      |      |             |              |   | No comment                                                                                |
|                   |    |            |    |                           |   |         |   |         |   |       |      |                        | 903  | m           | 903          | w | Flagellin(no match)                                                                       |
|                   |    |            |    |                           |   |         |   |         |   |       |      |                        | 940  | m           | 945          | w | Flagellin(no match)                                                                       |
| 1000              | vw |            |    |                           |   |         |   |         |   |       | 998  | vs                     | 1005 | w           | 1003         | w | No comment                                                                                |
| 1026              | m  | 1018       | w  |                           |   |         |   |         |   |       |      |                        |      |             |              |   | No comment                                                                                |
| 1045              | m  | 1036       | w  |                           |   |         |   |         |   |       | 1036 | m                      |      |             |              |   | No comment                                                                                |
|                   |    |            |    |                           |   |         |   |         |   |       | 1068 | s                      |      |             |              |   | No comment                                                                                |
| 1081              | s  |            |    |                           |   |         |   |         |   |       |      |                        |      |             |              |   | No comment                                                                                |
|                   |    | 1112       | s  |                           |   |         |   |         |   |       |      |                        |      |             |              |   | No comment                                                                                |
| 1129              | m  |            |    | 1129                      | s |         |   |         |   |       | 1127 | m                      | 1127 | m           | 1127         | w | Due to low intensities and possible line shift[8] there is no prove of flagellin presence |
| 1146              | m  | 1147       | w  |                           |   |         |   |         |   |       |      |                        |      |             |              |   | No comment                                                                                |
| 1174              | vw | 1185       | m  | 1174                      | m |         |   |         |   |       |      |                        |      |             |              |   | Rocking of $Hs$ on $C_\beta$ atoms[1] and $C_\beta - C_\phi$ bond stretching[9]           |
| 1227              | m  | 1224       | m  | 1230                      | m | 1227    | w | 1234    | w | 1224  | s    | 1238                   | s    |             |              |   | Rocking of $Hs$ on $N$ atoms[1]                                                           |

| Experimental Data |    |          |    | Shewanella and heme lines |    |         |    |         |    |       |    |          |    | Flagella and Flagellin |    |              |    | Comment                                                                                                                                                            |
|-------------------|----|----------|----|---------------------------|----|---------|----|---------|----|-------|----|----------|----|------------------------|----|--------------|----|--------------------------------------------------------------------------------------------------------------------------------------------------------------------|
| SERS              |    | HS Raman |    | Porphirine[1]             |    | MtrC[2] |    | OmcA[2] |    | CS[2] |    | CS II[3] |    | Flagella[4]            |    | Flagellin[4] |    |                                                                                                                                                                    |
| 1250              | w  | 1243     | w  |                           |    | 1252    | w  | 1254    | w  | 1246  | s  |          |    | 1248                   | s  | 1246         | s  | 3° amide [7]. Although there is a match with both flagella and flagellin, lines are indistinguishable with pure decaheme lines. Intensities diff. too much         |
| 1275              | m  |          |    |                           |    | 1279    | vw | 1271    | vw |       |    |          |    | 1269                   | s  |              |    | No comment                                                                                                                                                         |
|                   |    |          |    |                           |    |         |    | 1287    | vw | 1288  | vw |          |    |                        |    |              |    | No comment                                                                                                                                                         |
| 1307              | s  | 1303     | s  | 1312                      | s  | 1316    | vs | 1314    | vs | 1306  | vs | 1307     | vs |                        |    |              |    | $N - C_{\alpha} - C_{\beta}$ or $HN - C_{\alpha'} - C_{\beta'}$ assym. stretching[1] and $\nu_{21}$ ImH [5]                                                        |
|                   |    |          |    |                           |    |         |    |         |    |       |    |          |    | 1327                   | m  | 1322         | m  | Flagellin (no match)                                                                                                                                               |
| 1341              | vs | 1336     | w  |                           |    |         |    |         |    |       |    |          |    |                        |    |              |    | Peak in multiple wide line                                                                                                                                         |
| 1356              | vs | 1357     | vw | 1362                      | s  | 1373    | m  | 1368    | m  | 1362  | s  |          |    |                        |    |              |    | $\nu_4$ ImH[5]. Also indicates six-coordinated $Fe^{II}$ in low-spin state[6]                                                                                      |
| 1398              | vs | 1407     | w  | 1399                      | vs | 1399    | s  | 1399    | s  | 1398  | vs |          |    |                        |    |              |    | $C_{\alpha} - N(H) - C_{\alpha}$ sym. stretching[1] and $\nu_{29}$ ImH[5]                                                                                          |
| 1432              | m  | 1435     | m  |                           |    | 1430    | m  |         |    |       |    |          |    | 1425                   | m  |              |    | Match with spectra and flavine (semiquinone)[9]                                                                                                                    |
| 1445              | m  | 1459     | m  |                           |    | 1458    | vw | 1446    | w  | 1448  | m  |          |    | 1452                   | vs | 1453         | vs | $CH_2$ scissoring[7]. Although there is a match with both flagella and flagellin, lines are indistinguishable with pure decaheme lines. Intensities diff. too much |
| 1463              | w  | 1467     | m  |                           |    |         |    |         |    | 1466  | s  |          |    |                        |    |              |    | No comment                                                                                                                                                         |
| 1514              | m  | 1503     | vw | 1483                      | s  | 1500    | vw | 1500    | s  | 1494  | w  |          |    |                        |    |              |    | $C_{\alpha} - NH - C_{\alpha}$ sym. stretching[1] Also indicates Intermediate-Spin $Fe^{II}$ [10]                                                                  |
| 1541              | vs | 1547     | w  | 1548                      | vs |         |    | 1536    | m  | 1528  | m  |          |    |                        |    |              |    | $\nu_{11}$ ImH[5]. Also indicates six-coordinated $Fe^{II}$ in low-spin state[6]                                                                                   |
| 1569              | m  | 1561     | w  |                           |    | 1564    | vs |         | m  |       |    |          |    |                        |    |              |    | $\nu_{38}$ ImH[5] Also indicates Intermediate-Spin $Fe^{II}$ [10]                                                                                                  |
| 1589              | m  | 1605     | vs | 1584                      | vs | 1588    | vs | 1588    | vs | 1594  | vs | 1583     | vs |                        |    |              |    | $\nu_{37}$ and $\nu_2$ ImH[5] Also indicates Intermediate-Spin $Fe^{II}$ [10]                                                                                      |
| 1621              | s  | 1617     | m  | 1620                      | vs |         |    |         |    | 1617  | vs |          |    |                        |    |              |    | $\nu_{10}$ ImH[5] also may be a trace of semiquinone[9]                                                                                                            |
| 1642              | m  |          |    |                           |    | 1639    | vs | 1641    | s  |       |    |          |    |                        |    |              |    | MtrC and OmcA match. $\nu_{10}$ ImH[5]. Also indicates Intermediate-Spin $Fe^{II}$ [10]                                                                            |
|                   |    |          |    |                           |    |         |    |         |    |       |    | 1660     | m  | 1652                   | vs | 1662         | vs | Flagellin in aerobic cells                                                                                                                                         |

Intensities: **vw** - very weak, **w** - weak, **m** - medium, **s** - strong, **vs** - very strong. Other: **ImH** - Imidazole complex of cytochrome.  $\gamma_i$  or  $\nu_i$  - lines numbering according to given citations. Numbers in **bold** indicate the most important lines in spectra.

## References

- Aydin M (2013) DFT and Raman spectroscopy of porphyrin derivatives: Tetraphenylporphine (TPP). *Vibrational Spectroscopy* 68:141–152.
- Wang Y et al. (2013) Single-cell imaging and spectroscopic analyses of Cr(VI) reduction on the surface of bacterial cells. *Langmuir: the ACS journal of surfaces and colloids* 29(3):950–6.
- Ravindranath SP, Henne KL, Thompson DK, Irudayaraj J (2011) Surface-enhanced Raman imaging of intracellular bioreduction of chromate in *Shewanella oneidensis*. *PLoS ONE* 6(2):1–10.
- Uchiyama T et al. (2008) Raman optical activity of flagellar filaments of *Salmonella*: Unusually intense ROA from L-type self-assembled protein filaments and their possible higher level chiral organization. *Vibrational Spectroscopy* 48(1):65–68.
- Othman S, Le Lirzin A, Desbois A (1994) Resonance Raman investigation of imidazole and imidazolite complexes of microperoxidase: Characterization of the bis(histidine) axial ligation in c-type cytochromes. *Biochemistry* 33(51):15437–15448.
- Linard JE, Shriver DF, Basolo F (1980) Structure-sensitive resonance Raman bands of capped tetraphenylporphyrinatoiron complexes. *Proc.Natl.Acad.Sci.U.S.A* 77(0027-8424 (Print)):1741–1744.
- Preciado-Flores S et al. (2011) SERS spectroscopy and SERS imaging of *Shewanella oneidensis* using silver nanoparticles and nanowires. *Chemical communications (Cambridge, England)* 47(14):4129–4131.
- Ghosh C, Mukherjee S, Dey SG (2013) Direct electron transfer between Cyt c and heme- $A_{\beta}$  relevant to Alzheimer's disease. *Chemical communications (Cambridge, England)* 49(51):5754–6.
- Tripathi GNR (1981) Resonance Raman scattering of semiquinone radical anions. *The Journal of Chemical Physics* 74(11):6044–6049.
- Spiro TG, Burke JM (1976) Protein control of porphyrin conformation. Comparison of resonance Raman spectra of heme proteins with mesoporphyrin IX analogues. *Journal of the American Chemical Society* 98(18):5482–9.
